# Supplementary material
Source: PubMed Central journal article supplement (PMC3365146)
Supplement: 1120273109_pnas.1120273109_SI.pdf [file 1120273109_pnas.1120273109_SI.pdf]

# Supporting Information

Butch et al. 10.1073/pnas.1120273109

## SI Text

**Scaling of the Quadratic Coefficient  $A_2$  of the Resistivity in the Fermi Liquid State.** Fits to the electrical resistivity of the form  $\rho = \rho_0 + A_2 T^2$  were performed on the high field side of  $B_c$ , i.e., in the field-induced Fermi liquid (FL) ground state. As a function of magnetic field, the data scale with identical critical exponent  $\alpha = 0.38$ . This analysis was performed on data from multiple samples at each concentration. In order to plot the data together in Fig. 4A, the absolute values of the coefficients for each sample were scaled by a constant value, which maintains the integrity of the scaling analysis. The necessity for rescaling is expected because of the sensitivity of the scattering to sample dependence beyond experimental control, which makes the success of the  $A_2$  scaling all the more remarkable. A similar approach was used to put together Fig. 4B. Note that, experimentally, the step size is much coarser in the doping direction, and the uncertainty is larger due to the aforementioned sample dependence.

**Resistivity Scaling Above the Fermi Liquid Boundary  $B_c$ .** The scaling of  $\rho(T)$  reflects the fact that the resistivity  $\Delta\rho$  can be described generally as a function  $A_2 T^2 f(\Delta B^\gamma/T)$ , where  $\Delta B = B - B_c$ , that is applicable to scattering in both Fermi liquid ( $\Delta\rho \propto T^2$ ) and non-Fermi liquid (NFL) ( $\Delta\rho \propto T^n$ ) regions. In this framework, the  $T^n$  behavior in the NFL region stems from anomalous temperature dependence in  $A_2$ , which is by definition a constant in temperature in the FL state. The resultant picture is that  $T_{FL}$  separates the FL state at high magnetic field and low temperature from the NFL region at low magnetic field and high temperature,

consistent with the magnetic field dependence of  $T_{FL}$  (Fig. 1C). This picture also suggests that upon crossing  $T_{FL}$  the dominant energy scale is transferred from temperature to magnetic field, which implicitly suggests that any dominant energy scale, such as Fermi energy, is absent.

The exponents  $\alpha$ ,  $\gamma$ , and  $n$  are related as  $\alpha = \gamma(2 - n)$  by considering the following asymptotic limits: (i) Fermi liquid ( $T \ll \Delta B$ ):  $\Delta\rho = A_2(B)T^2$ . In this limit,  $\Delta\rho/A_2(B)T^2 = 1$  and thus  $f(\Delta B^\gamma/T) \rightarrow 1$ . (ii) Non-Fermi liquid ( $T \gg \Delta B$ ):  $\Delta\rho = A_n T^n = A_2(B)T^2 \times (\Delta B^\gamma/T)^{2-n}$ . Our data show that when  $n < 2$ ,  $\Delta\rho < A_2(B)T^2$  and thus  $f(\Delta B^\gamma/T) < 1$ . Note that it is possible to define  $A_2'(B, T) = A_2(B) \times (\Delta B^\gamma/T)^{2-n}$ , or in other words, explicitly add a temperature dependence to  $A_2$ , which is a constant in temperature in the Fermi liquid state. However, from Fig. 4A we already know that  $A_2 \propto \Delta B^\alpha$ , and because  $A_2$  and  $A_2'$  must have the same magnetic field dependence, it follows that  $\gamma(2 - n) = \alpha$ .

For  $x = 0.17$ , scaling is satisfied using an exponent  $\gamma = 1.0 \pm 0.02$ , so  $\alpha = 0.38$  forces  $n \approx 1.6$ . For  $x = 0.15$ , scaling is satisfied using an exponent  $\gamma = 0.4 \pm 0.1$ , so  $\alpha = 0.38$  forces  $n \approx 1.0$  (Fig. S4).

The plots in Fig. 4 show the difference between Fermi liquid and non-Fermi liquid behavior. In the Fermi liquid state,  $\Delta\rho/A_2 T^2 = 1$  by definition, and the slope of the scaled curve is zero. In contrast, in the non-Fermi liquid regime the slope of the scaled curve is positive, reflecting the notion that  $A_2$  is no longer a constant.
